# Supplementary material for: Responsible exit of humanitarian aid agencies at the end of programmes: a scoping review protocol
Source: PubMed Central journal article supplement — BMJ Open. 2023 Aug 23;13(8):e071544. doi: 10.1136/bmjopen-2022-071544 (PMC10450037; doi:10.1136/bmjopen-2022-071544), 2023-08-23
Supplement: bmjopen-2022-071544.draft_revisions.pdf [file bmjopen-2022-071544.draft_revisions.pdf]

# BMJ Open

BMJ Open is committed to open peer review. As part of this commitment we make the peer review history of every article we publish publicly available.

When an article is published we post the peer reviewers' comments and the authors' responses online. We also post the versions of the paper that were used during peer review. These are the versions that the peer review comments apply to.

The versions of the paper that follow are the versions that were submitted during the peer review process. They are not the versions of record or the final published versions. They should not be cited or distributed as the published version of this manuscript.

BMJ Open is an open access journal and the full, final, typeset and author-corrected version of record of the manuscript is available on our site with no access controls, subscription charges or pay-per-view fees (<http://bmjopen.bmj.com>).

If you have any questions on BMJ Open's open peer review process please email [info.bmjopen@bmj.com](mailto:info.bmjopen@bmj.com)

# BMJ Open

## Responsible exit of humanitarian aid agencies at the end of programs: a scoping review protocol

|                               |                                                                                                                                                                                                                           |
|-------------------------------|---------------------------------------------------------------------------------------------------------------------------------------------------------------------------------------------------------------------------|
| Journal:                      | <i>BMJ Open</i>                                                                                                                                                                                                           |
| Manuscript ID                 | bmjopen-2022-071544                                                                                                                                                                                                       |
| Article Type:                 | Protocol                                                                                                                                                                                                                  |
| Date Submitted by the Author: | 02-Jan-2023                                                                                                                                                                                                               |
| Complete List of Authors:     | Bahati, Djoki; Médecins Sans Frontières SY, HOUSSYNATOU; Institute of Tropical Medicine, Public Health Kalhor, Aram; Medecins Sans Frontieres Marchal, Bruno; Institute of Tropical Medicine, Department of Public Health |
| Keywords:                     | PUBLIC HEALTH, ETHICS (see Medical Ethics), MEDICAL ETHICS                                                                                                                                                                |
|                               |                                                                                                                                                                                                                           |

SCHOLARONE™  
Manuscripts

Responsible exit of humanitarian aid agencies at the end of programs: a scoping review protocol

**Authors:** Djoki Bahati<sup>1\*</sup> (DB), Houssynatou Sy<sup>2</sup> (HS), Aram Kalhor<sup>3</sup> (AK) and Bruno Marchal<sup>4</sup> (BM)

<sup>1</sup> MD, Msc. in Public Health, medical coordinator at Médecins Sans Frontières, Geneva, Switzerland

<sup>2</sup> Msc. in Public Health, Researcher in the Health Policy Unit at the Institute of Tropical Medicine, Antwerp, Belgium

<sup>3</sup> MD, Deputy medical coordinator at Médecins Sans Frontières, Geneva, Switzerland

<sup>4</sup> MD, MPH, PhD, associate professor and head of the Complexity and Health unit at the Institute for Tropical Medicine, Antwerp, Belgium

\* Corresponding author: Djoki Bahati

Address: Plot 648, Entebbe Road, Namulanda, Kampala, Uganda

Mobile : (+256) 708 686 214

Mail : [djoki.joss@gmail.com](mailto:djoki.joss@gmail.com)

## Abstract

**Introduction:** In humanitarian settings, aid agencies are constantly challenged by difficult decisions such as when and how to terminate the aid without harming the aid recipients, local institutions, staff members and the organization. Despite important efforts devoted to responsibly leaving a setting, hurtful exits are still common in contemporary relief aid. Moreover, debates on how humanitarian aid agencies exit is believed to be limited with no previous comprehensive evidence synthesis on the concept of “responsible exit”.

**Objective:** The objective of this scoping review is to map evidence and knowledge gaps, identify and describe concepts, theories and existing frameworks related to “responsible exit” of humanitarian aid agencies

**Methods and analysis:** we will first search the following bibliographic databases: CAB Direct (including Global Health), Web of Science, PubMed, and Google Scholar. Secondly, we will carry out manual searches of specific journals. Third, grey literature will be retrieved through search on organizational websites, direct contact with experts and organizations. Finally, reference tracking will provide additional sources. To be included, published or unpublished papers must explicitly or implicitly discuss the exit of humanitarian aid agencies from humanitarian settings and be accessible. We will exclude all exit related to military and governmental humanitarian operations, business, education, development, employment, and business sectors. Only papers written in English and French will be considered. Three reviewers will conduct the selection process against the pre-defined criteria. Data will be extracted in an iterative process following a pre-established items in an excel spreadsheet and the results will be presented in PRISMA-ScR flowchart, tables and/ or graphs, and descriptive formats.

**Dissemination and Ethics:** The results will be disseminated through publication in a scientific open access journal, scientific conferences, workshops, and certain humanitarian aid agencies to facilitate further research and possible practical translations of generated knowledge.

Being a review, conducted on publicly available information, no ethical approval is required.

## Strengths and limitations of the study

- To our knowledge, the present scoping review is the first one comprehensively looking at the diverse aspects of “responsible exit” of humanitarian aid agencies
- This review adheres to the JBI’s scoping review guidance, ensuring systematisation, traceability, and reproducibility of the process
- To enhance transparency, the current project has been registered with Open Science Framework
- Although no time limitation will be applied for paper inclusion, limiting the screening to papers published in English and French is the major limitation to the project

## INTRODUCTION

Amid the increasing funding gaps, the global humanitarian aid system struggles to effectively respond to crises. Although the funding of humanitarian action has doubled in the last decade, it reached a ceiling in the past four years while the global humanitarian needs have risen steadily. (3) Moreover, this trend is expected to worsen in a context of increasing conflicts and political instability, pandemics, climate change, and reversed development gains in employment, food security, education, and healthcare. (1-3) Furthermore, the above factors, in an intersectional fashion, can weaken health systems in humanitarian settings in all their building blocks. (4,5) Consequently, humanitarian aid agencies, designed to deploy temporary interventions, are challenged with difficult decisions concerning when to prolong or terminate projects. (6-8) Exiting from humanitarian settings is known to be a challenging and highly complex process, influenced by a wide range of factors, since contemporary relief aid can be considered as a complicated set of operations undertaken in an often highly politicized and insecure context, and involving multiple actors with diverging interests. (6)

Unsuccessful exits are common and often find their root causes in poorly planned and implemented processes. This can lead to a range of detrimental outcomes for the aid recipients, the local health system, the national staff, the departing organization, and other partners. (2,7,9-11) Several international initiatives, toolkits, and guidance documents, such as the “*Sphere project*” and “*The Agenda for Humanity*” (2,6,12,13), emphasize that strategic planning as essential to ensure positive long-term effects and to reduce the risk of dependency. Yet, exiting responsibly from humanitarian settings is not straightforward. (6)

Although the exit strategies have been increasingly recognized as an important topic in the humanitarian sector since the beginning of the twenty-first century (2), Bolt K et al argue that the debate on how humanitarian aid agencies leave at the end of the program is much smaller compared

to other stages of the project cycle in the humanitarian literature. For instance, projects evaluations tend to focus on other phases of the project cycle (starts, monitoring...), their efficiency, the logistics of the aid delivery. (8) Even though Pal et al have synthesized the evidence on the ethics of closing humanitarian projects (2), to our knowledge, there is no comprehensive evidence synthesis on the so called “responsible exit” of humanitarian aid agencies.

## REVIEW QUESTION AND OBJECTIVES

Using the Participant-Concept-Context (PCC) framework (11) (referred as PCC in Table 1), we formulate the review question as follows: *What is known from the literature on the exit strategies of non-governmental humanitarian organizations.* More specifically, this review aims at answering the following questions:

- What are the characteristics of the exit strategies of humanitarian aid agencies?
- What are the knowledge gaps concerning the exit strategies of humanitarian aid agencies?
- What are the attributes and guiding principles of ‘responsible exit’ strategies of humanitarian aid agencies?
- What “responsible exit” frameworks exist and/or are being used by the humanitarian aid agencies?

We aim at mapping the existing evidence regarding exit strategies and the knowledge gaps. We will identify and describe the core concepts, theories and existing frameworks related to “responsible exit” of humanitarian aid agencies.

**Table 1** PCC framework - Attributes & rationale

| PCC framework      | Attributes                     | Rationale                                                                                                                         |
|--------------------|--------------------------------|-----------------------------------------------------------------------------------------------------------------------------------|
| <b>Participant</b> | Non-governmental organizations | Highly debated notions of “sustainability”, “relief-development nexus” and the “do no harm” principles in humanitarian operations |
| <b>Concept</b>     | Exit strategy                  | Complex phenomenon and challenging process for humanitarian aid agencies                                                          |

|                |                                                                                                                |                                            |
|----------------|----------------------------------------------------------------------------------------------------------------|--------------------------------------------|
| <b>Context</b> | Humanitarian settings (natural & man-made disasters, conflicts, post-conflict, epidemics, forced displacement) | Natural scene of humanitarian aid agencies |
|----------------|----------------------------------------------------------------------------------------------------------------|--------------------------------------------|

## METHODS

The proposed project will be conducted in accordance with the Joanna Briggs Institute (JBI) methodology for scoping reviews. (16) More specifically, this section firstly details the processes of identifying and selecting relevant studies and reports. It then looks at the data extraction methodology and finally it presents how the findings will be analysed and presented.

### Identifying relevant studies and reports

#### Types of Sources

This scoping review will consider both bibliographic databases and grey literature databases with no limitations to study designs. Literature reviews meeting the inclusion criteria will be considered.

#### Search strategy

Using the above PCC frameworks, an initial limited keywords search of CAB Direct (including global health) and PubMed was undertaken to identify articles on the topic. The text words contained in the titles and abstracts of relevant articles, keywords and the subject headings used to describe the articles were used to develop a full search strategy (see examples in Tables 2 & 3). The last was reviewed by a librarian. The search strategy, including all identified keywords and index terms, will be adapted for each selected database. Backward and forward reference tracking will allow to search for additional sources.

Table 2. Search strings in CAB Direct (including global health) on 5<sup>th</sup> December 2022

| Search # | Query                                                                                                                                                                                                                                                                                                                                                                                                                                                                                                                                                                                                                                     |
|----------|-------------------------------------------------------------------------------------------------------------------------------------------------------------------------------------------------------------------------------------------------------------------------------------------------------------------------------------------------------------------------------------------------------------------------------------------------------------------------------------------------------------------------------------------------------------------------------------------------------------------------------------------|
| 1        | ((title:( "emergency relief" OR "Oxford Committee for Famine Relief" OR "relief" OR "disasters" OR "natural disasters" OR "non-governmental organization" OR "non-governmental agency" OR "humanitarian aid") OR ab:( "emergency relief" OR "Oxford Committee for Famine Relief" OR "relief" OR "disasters" OR "natural disasters" OR "non-governmental organization" OR "non-governmental agency" OR "humanitarian aid")) AND (title:( "exit " OR "closing" OR "withdrawal strategy" OR "withdrawal" OR "phasing" OR "handover" OR "transition") OR ab:( "exit" OR "closing" OR "withdrawal" OR "phasing" OR "handover" OR "transition") |

Table 3. Search strings in PubMed on 5<sup>th</sup> December 2022

| Search # | Query                                                                                                                                                                                         |
|----------|-----------------------------------------------------------------------------------------------------------------------------------------------------------------------------------------------|
| 3        | (#1) AND (#2)                                                                                                                                                                                 |
| 2        | (((((exit [Title/Abstract]) OR (closing [Title/Abstract])) OR (withdrawal [Title/Abstract])) OR (phasing [Title/Abstract])) OR (handover [Title/Abstract])) OR (transition [Title/Abstract])) |
| 1        | ((("Disasters"[Mesh]) OR "Natural Disasters"[Mesh]) OR "Relief Work"[Mesh] OR "Non-governmental organization" OR "non-governmental agency" OR "humanitarian aid")                             |

Following discussions with the librarian and using the above keywords and subject headings, we will search the following bibliographic databases: CAB Direct (including Global Health), Web of Science, PubMed and Google Scholar. Moreover, we will carry out manual searches of specific journals, such as the Journal of Humanitarian Affairs, the Journal of Humanitarian Aid, and the Journal of Humanitarian Assistance. To identify grey literature, we will firstly search humanitarian organizational websites through google, using the following syntaxes such as *emergency OR relief OR humanitarian OR disaster OR non-governmental organization AND "Exit strategy" site:.org*. Only the first ten google pages will be screened for relevant documents. In a second stage, we will directly contact major organizations and expert authors in humanitarian sector for relevant grey literature. Furthermore, the reference list of relevant studies and report will be searched for additional sources.

Owing to resource limitations, only studies published in English and French will be included. No time limit (i.e., year of publication) will be applied.

## Selecting relevant papers

### Selection process

Firstly, all identified citations will be collated and uploaded onto Rayyan.ai (17) and deduplicated. Secondly, titles and abstracts will be independently screened by DB, HS, and AK for assessment against the eligibility criteria (Table 2). Finally, against the same criteria, the full text of selected citations will be assessed in depth. All reasons for exclusion of sources of evidence will be recorded and displayed in the final report. Any disagreements that arise between the reviewers at any stage of the selection process will be resolved through discussion and if no agreement can be reached, BM will step in.

## Eligibility criteria

To be included in this review, the paper must explicitly discuss the exit of non-governmental humanitarian aid agencies and be available in full text online or through direct contacts. Since we aim in focusing on non-governmental humanitarian organizations, we will exclude all papers focused on military-humanitarian aid, governmental humanitarian aid, development aid, and papers that discuss studies from business, employment, and education sectors, as well as papers presenting exit strategies related to COVID-19 measures.

The “exit strategy”, the concept of concern, is understood as the organizational management practice of how an agency leaves a community after implementing a program. (15) We will include situations where a project was closed completely or handed over to another organization or entity, phased down or transitioned to recovery or development agencies.

The context is humanitarian aid settings, defined by natural and man-made disasters, armed conflicts, post-conflict settings, epidemics, situations of forced migration and fragile settings.

Further details of eligibility criteria are presented in the table 4.

Table 4. Eligibility criteria

| Criteria            |                                                                                                                                                   |                                                                                                                                                   |
|---------------------|---------------------------------------------------------------------------------------------------------------------------------------------------|---------------------------------------------------------------------------------------------------------------------------------------------------|
| Domains             | Inclusion Criteria                                                                                                                                | Exclusion Criteria                                                                                                                                |
| <b>Participants</b> | Non-governmental humanitarian agencies                                                                                                            | military-humanitarian aid, governmental humanitarian aid, development aid, business, employment, and education sectors, COVID-19 control measures |
| <b>Concept</b>      | Exit strategy (phase out, phase-down, phase-over, camp closure, transition from relief to rehabilitation)                                         | None                                                                                                                                              |
| <b>Context</b>      | Humanitarian settings (natural and man-made disasters, armed conflicts, post-conflict settings, epidemics, forced migration and fragile settings) | Others                                                                                                                                            |



|                         |                                                                                                                                                                             |        |
|-------------------------|-----------------------------------------------------------------------------------------------------------------------------------------------------------------------------|--------|
| <b>Language</b>         | English and French                                                                                                                                                          | Others |
| <b>Time restriction</b> | None                                                                                                                                                                        | None   |
| <b>Type of source</b>   | Published and unpublished papers without methodological limitations (journal papers, reports, guidelines, conference proceedings, magazines, newspaper, strategy papers...) | None   |

The results of the search and selection process will be fully reported in the final scoping review and presented in a Preferred Reporting Items for Systematic Reviews extension for scoping review (PRISMA-ScR) flow diagram. (18)

## Data Extraction

Building on research questions, a draft extraction form is provided in Table 5. It includes bibliometric parameters (Authors, types of paper, year of publication or production, country of focus, context, organization) and thematic items regarding “exit” and “responsible exit” of humanitarian aid agencies. The initial data extraction form will be subject to modifications, in an iterative fashion, during the data extraction process. Any modification will be reported in the scoping review report.

Table 5. Data extraction form

| <b>Domains</b>        | <b>Sub-domains</b>    | <b>Description</b>                                                                        |
|-----------------------|-----------------------|-------------------------------------------------------------------------------------------|
| <b>Bibliometrics</b>  | Author (s)            | Last name, First name or name of the organization                                         |
|                       | Year                  | Year of publication or production (grey literature)                                       |
|                       | Type of paper         | Journal, Book, Book section, reports, guideline, conference proceedings, opinion paper... |
|                       | Country               | Country of focus if any                                                                   |
|                       | Context               | Protracted crisis, natural disaster, displacement, pandemic...                            |
|                       | Organization          | Organization of Focus                                                                     |
| <b>Thematic items</b> | Definitions           | Related to exit                                                                           |
|                       | Exit categories       | Types of exit strategies                                                                  |
|                       | Decision-making       | Concepts and theories in exit decision-making                                             |
|                       | Challenges & outcomes | Challenges to successfully strategize & impacts of unsuccessful exits                     |

|  |                  |                                                                                                 |
|--|------------------|-------------------------------------------------------------------------------------------------|
|  | Responsible exit | Key characteristics of responsible exits (definition, goal, attributes, and guiding principles) |
|  | Frameworks       | Existing or used “responsible exit” frameworks                                                  |
|  | Knowledge gaps   |                                                                                                 |

After piloting the above form on five randomly selected relevant papers, DB and NS will extract data from selected papers. Extracted data will be extensively and iteratively discussed with all authors and any unclear findings will be subject to further analysis and discussion.

### Data Analysis and Presentation

Extracted data will be collated, analyzed, and summarized in an iterative manner. First, the identification and selection processes will be summarized in a PRISMA-ScR frame, along with a tabulated and/or graphic summaries of the included references. Subsequently, in a narrative format, we will summarize the extracted data and report on them according to the review objectives. We anticipate a four-month timeline to finalize the present review (Table 6).

Table 6. Anticipated timeline

| The review stages                                                   | Month    |          |          |          |
|---------------------------------------------------------------------|----------|----------|----------|----------|
|                                                                     | Dec 2022 | Jan 2023 | Feb 2023 | Mar 2023 |
| Stage 1. Conceptualizing, clarifying review question and objectives | x        |          |          |          |
| Stage 2. Identifying papers                                         |          | x        |          |          |
| Stage 3. Selecting relevant papers                                  |          |          | x        |          |
| Stage 4. Data extraction                                            |          |          | x        | x        |
| Stage 5. Collating, analyzing, summarizing, and reporting results   |          |          |          | x        |

### Patient and Public Involvement

No patient involved.

### DISSEMINATION AND ETHICS

The findings of the review will be submitted for publication in a scientific open access journal. The outcomes of this scoping review will be disseminated through conferences, workshops, and certain humanitarian aid agencies to facilitate further research and possible practical translations of generated knowledge.

1  
2  
3 Being a review, conducted on publicly available information, no ethical approval is required.  
4  
5

## 6 **Author's Contributions**

7 Djoki Bahati and Bruno Marchal: Conceptualization

8  
9 Dirk Schoonbaert (librarian from Institute of Tropical Medicine, Antwerp, Belgium): Inputs on  
10 database selection, review of search strategy

11  
12 Djoki Bahati, Houssynatou Sy, Aram Kalhor: Search and Selection of relevant papers

13 Djoki Bahati, Houssynatou Sy: Data extraction, analysis, and elaboration of the first draft report

14  
15 Djoki Bahati, Houssynatou Sy, Aram Kalhor and Bruno Marchal: Review and finalization of the report  
16  
17

## 18 **Funding**

19  
20 This research received no specific grant from any funding agency in the public, commercial or not-for-  
21 profit sectors.  
22

## 23 **Competing interest**

24  
25 None to declare.  
26  
27

## 28 **REFERENCES**

- 29  
30  
31 1. United Nations Office for the Coordination of Humanitarian Affairs. Global humanitarian  
32 overview 2022 [Internet]. New York: United Nations; 2021. [cited 2022 Apr 23]. 304 p. Available  
33 from: <https://gho.unocha.org/>  
34  
35  
36 2. Pal NE, Eckenwiler L, Hyppolite SR, et al. Ethical considerations for closing humanitarian projects:  
37 a scoping review. *J Int Humanit Action*. 2019 Nov 4;4(1):1–9. DOI: 10.1186/s41018-019-0064-9  
38  
39  
40 3. Obrecht A, Swithern S, Doherty J. *The state of the humanitarian system 2022*. 5th ed. London:  
41 ALNAP; 2022. 358 p.  
42  
43  
44 4. Hill PS, Pavignani E, Michael M, et al. The “empty void” is a crowded space: health service  
45 provision at the margins of fragile and conflict affected states. *Confl Health*. 2014 Oct 22;8(1):10.  
46  
47  
48 5. Brinkerhoff DW. *From humanitarian and post-conflict assistance to health system strengthening*  
49 *in fragile states: clarifying the transition and the role of NGOs*. Bethesda. 2008. 8 p.  
50  
51  
52 6. Sung YL, Alpaslan Ö. Exit strategies. In: Ginty R Mac, Peterson JH, editors. *The routledge*  
53 *companion to humanitarian action*. 1st Ed. London: Routledge; 2015. p. 372-84.  
54  
55  
56 7. Hunt M, Eckenwiler L, Hyppolite SR, et al. Closing well: national and international humanitarian  
57 workers’ perspectives on the ethics of closing humanitarian health  
58  
59  
60

- 1
  - 2
  - 3
  - 4
  - 5
  - 6
  - 7
  - 8
  - 9
  - 10
  - 11
  - 12
  - 13
  - 14
  - 15
  - 16
  - 17
  - 18
  - 19
  - 20
  - 21
  - 22
  - 23
  - 24
  - 25
  - 26
  - 27
  - 28
  - 29
  - 30
  - 31
  - 32
  - 33
  - 34
  - 35
  - 36
  - 37
  - 38
  - 39
  - 40
  - 41
  - 42
  - 43
  - 44
  - 45
  - 46
  - 47
  - 48
  - 49
  - 50
  - 51
  - 52
  - 53
  - 54
  - 55
  - 56
  - 57
  - 58
  - 59
  - 60
8. Bolt K, Westra M. The current organizational approach to exit strategies in humanitarian relief projects: a study on decision-making processes in large humanitarian organizations. [Thesis]. Groningen: University of Groningen; 2014. 87 p.
9. Tull K. Responsible exit from humanitarian interventions [Internet]. Leeds: K4D helpdesk; 2020 Apr 20 [cited 2022 Apr 14]. 21 p.  
Available from: <https://opendocs.ids.ac.uk/opendocs/handle/20.500.12413/15307>
10. Heyse L. Choosing the lesser evil - understanding decision making in humanitarian aid NGOs. Burlington: Ashgate Publishing Limited; 2006. 252 p.
11. Ahmed F, Halley D, Robinson J. Planning for success from start to exit: a review of literature, policy and practice [Internet]. 2018. [cited 2021 Nov 11]. p. 36. Available from: <http://www.stoppingassuccess.org/publications/>
12. Sphere Association. The sphere handbook: humanitarian charter and minimum standards in humanitarian response. 4th Ed. Geneva: Sphere Association; 2018. 402p.
13. United Nations. Agenda for humanity [Internet]. New York: United Nations; 2016 [cited 2022 May 30]. Available from: <http://agendaforhumanity.org/sites/default/files/AgendaforHumanity.pdf>
14. Hunt M, Miao J. Moral entanglement and the ethics of closing humanitarian medical aid projects. In: Ayesha A, Smith J, editors. Humanitarian action and ethics. London: Zed Books Ltd; 2017. p. 22-39.
15. Boardman M. Exit strategies: approaches and challenges in development. In: Thornton A, McGregor A, editors. Southern perspectives on development: dialogue or division? Dunedin: University of Otago; 2006. p. 477-86
16. Peters MDJ, Marnie C, Tricco AC, et al. Updated methodological guidance for the conduct of scoping reviews. *JBMI Evid Synth*. 2020 Oct 1;18(10):2119–26.
17. Ouzzani M, Hammady H, Fedorowicz Z, et al. Rayyan-a web and mobile app for systematic reviews. *Syst Rev* [Internet]. 2016 Dec 5 [cited 2022 Dec 21];5(1). Available from: <https://pubmed.ncbi.nlm.nih.gov/27919275/>
18. Tricco AC, Lillie E, Zarin W, et al. PRISMA extension for scoping reviews (PRISMA-ScR): Checklist and explanation. *Ann Intern Med*. 2018;169(7):467–73.

**Word count: 2988**

# BMJ Open

## Responsible exit of humanitarian aid agencies at the end of programs: a scoping review protocol

|                                 |                                                                                                                                                                                                                           |
|---------------------------------|---------------------------------------------------------------------------------------------------------------------------------------------------------------------------------------------------------------------------|
| Journal:                        | <i>BMJ Open</i>                                                                                                                                                                                                           |
| Manuscript ID                   | bmjopen-2022-071544.R1                                                                                                                                                                                                    |
| Article Type:                   | Protocol                                                                                                                                                                                                                  |
| Date Submitted by the Author:   | 28-Jun-2023                                                                                                                                                                                                               |
| Complete List of Authors:       | Bahati, Djoki; Médecins Sans Frontières SY, HOUSSYNATOU; Institute of Tropical Medicine, Public Health Kalhor, Aram; Medecins Sans Frontieres Marchal, Bruno; Institute of Tropical Medicine, Department of Public Health |
| <b>Primary Subject Heading</b>: | Global health                                                                                                                                                                                                             |
| Secondary Subject Heading:      | Public health                                                                                                                                                                                                             |
| Keywords:                       | PUBLIC HEALTH, ETHICS (see Medical Ethics), MEDICAL ETHICS                                                                                                                                                                |
|                                 |                                                                                                                                                                                                                           |

SCHOLARONE™  
Manuscripts

## Responsible exit of humanitarian aid agencies at the end of programs: a scoping review protocol

Djoki Bahati<sup>1\*</sup>, Houssynatou Sy<sup>2</sup>, Aram Kalhor<sup>3</sup>, Bruno Marchal<sup>4</sup>

<sup>1</sup> MD, Msc in Public Health, medical coordinator at Médecins Sans Frontières, Geneva, Switzerland

<sup>2</sup> Msc in Public Health, Researcher in the Health Policy Unit at the Institute of Tropical Medicine, Antwerp, Belgium

<sup>3</sup> MD, Deputy medical coordinator at Médecins Sans Frontières, Geneva, Switzerland

<sup>4</sup> MD, MPH, PhD, associate professor and head of the Complexity and Health unit at the Institute for Tropical Medicine, Antwerp, Belgium

\*Correspondence to:

Djoki Bahati

Plot 648, Entebbe Road, Namulanda, Kampala, Uganda

E-mail: [djoki.joss@gmail.com](mailto:djoki.joss@gmail.com)

### Abstract

**Introduction:** In humanitarian settings, aid agencies are constantly challenged by difficult decisions such as when and how to terminate aid without harming the aid recipients, local institutions, staff members and the organization. Despite important efforts devoted to responsibly leaving a setting, hurtful exits are still common in contemporary relief aid. Moreover, debates on how humanitarian aid agencies exit is limited, with no previous comprehensive evidence synthesis on the concept of “responsible exit”. The objective of this scoping review is to map evidence and knowledge gaps and to identify and describe concepts, theories and existing frameworks related to “responsible exit” of humanitarian aid agencies.

**Methods and analysis:** Our search utilises searches of several bibliographic databases (CAB Direct [including Global Health], Web of Science, PubMed, and Google Scholar) as well as manual searches of specific journals and retrieval of grey literature through searches of organizational websites and direct contact with experts and organizations. Reference tracking will be used to identify additional sources. Searches will cover papers available up to the dates of the searches (December 2022 to January 2023), with no date restrictions applied to the literature search. To be included, published or unpublished papers must explicitly or implicitly discuss the exit of humanitarian aid agencies from humanitarian settings and be accessible. We will exclude all exits related to military and governmental humanitarian operations, business, education, development, employment, and business sectors. Only papers written in English and French will be considered. Three reviewers will conduct the selection process against the pre-defined criteria. Data will be extracted in an iterative process following a pre-established items and the results will be presented in PRISMA-ScR flowchart, tables and/ or graphs, and descriptive formats.

**Ethics and dissemination:** Being a review, conducted on publicly available information, no ethical approval is required. The results will be disseminated through publication in an open access journal, scientific conferences, workshops, and via humanitarian aid agencies to facilitate further research and possible practical translations of generated knowledge.

For a full review, visit <http://bmjopen.bmj.com/lookup/abstract/guidelines.xhtml>

### Strengths and limitations of this study

- This review adheres to the JBI's scoping review guidance, ensuring systematisation, traceability, and reproducibility of the process.
- To enhance transparency, the current project has been registered with Open Science Framework
- Although no time limitation will be applied for paper inclusion, limiting the screening to papers published in English or French and publicly available or accessible to the authors through the Institute of Tropical Medicine's Library of Antwerp's library databases is a major limitation to the project.

## INTRODUCTION

Amid increasing funding gaps, the global humanitarian aid system struggles to effectively respond to crises. Although the funding of humanitarian action has doubled in the last decade, it reached a ceiling in the past four years while the global humanitarian needs have risen steadily. Moreover, this trend is expected to worsen in a context of increasing conflicts and political instability, pandemics, climate change, and reversed development gains in employment, food security, education, and healthcare. (1-3) Furthermore, the above factors, in an intersectional fashion, can weaken health systems in humanitarian settings in all their building blocks. (4,5) Consequently, humanitarian aid agencies, designed to deploy temporary interventions, are challenged with difficult decisions concerning when to prolong or terminate projects. (6-8) Exiting from humanitarian settings is known to be a challenging and highly complex process, influenced by a wide range of factors, since contemporary relief aid can be considered as a complicated set of operations undertaken in an often highly politicized and insecure context, and involving multiple actors with diverging interests. (6)

Unsuccessful exits are common and often find their root causes in poorly planned and implemented processes. This can lead to a range of detrimental outcomes for the aid recipients, the local health system, the national staff, the departing organization, and other partners. (2,7,9-11) Several international initiatives, toolkits, and guidance documents, such as the "*Sphere project*" and "*The Agenda for Humanity*" (2,6,12,13), emphasize that strategic planning as essential to ensure positive long-term effects and to reduce the risk of dependency. Yet, exiting responsibly from humanitarian settings is not straightforward. (6)

1  
2  
3 Diverse definitions and terminologies are used by organizations and academics to define what means  
4 a “good exit strategy”. Consequently, there is no unique way of defining “good exit” since different  
5 meanings may arise from diverse perspectives. Furthermore, different terminologies are  
6 interchangeably used to indicate “success”. For example, while Hunt M et al., or Pal et al. use “ethical  
7 exit”, Tull K., British Red Cross and Rachel et al. advance the term “responsible exit” and Lee promotes  
8 the term “viable exit”. Despite various terms used, some commonalities have been associated with  
9 the term, such as sustainability, inclusive participation, effective coordination, right timing,  
10 responsible planning, capacity building (2,9,14,15,16,17). For consistency, the term “responsible exit”  
11 will be used in this study.  
12

13  
14 Although the exit strategies have been increasingly recognized as an important topic in the  
15 humanitarian sector since the beginning of the twenty-first century (2), Bolt K et al argue that the  
16 debate on how humanitarian aid agencies leave at the end of the program is much smaller compared  
17 to other stages of the project cycle in the humanitarian literature. For instance, projects evaluations  
18 tend to focus on other phases of the project cycle (starts, monitoring...), their efficiency, the logistics  
19 of the aid delivery. (8) Even though Pal et al have synthesized the evidence on the ethics of closing  
20 humanitarian projects (2), their synthesis appears to solely focus on only two phases of the project  
21 cycle, namely the exit decision-making and implementation. In contrast, this project aims to go beyond  
22 these phases, from the assessment phases to the post-exit evaluation phases. Moreover, to our  
23 knowledge, there is no comprehensive evidence synthesis on the so called “responsible exit” of  
24 humanitarian aid agencies and the mapping of existing frameworks.  
25  
26

## 27 28 29 30 31 32 33 34 35 36 37 38 **Review question and objectives**

39  
40 Using the Participant-Concept-Context (PCC) framework (18) (Table 1), we formulate the review  
41 question as follows: *What is known from the literature on the “responsible exit” strategies of non-*  
42 *governmental humanitarian organizations.* More specifically, this review aims at answering the  
43 following questions:  
44  
45

- 46 - What are the characteristics of the exit strategies of international humanitarian aid agencies?
- 47 - What are the knowledge gaps concerning the exit strategies of international humanitarian aid  
48 agencies?
- 49 - What are the attributes and guiding principles of “responsible exit” strategies of international  
50 humanitarian aid agencies?
- 51 - What “responsible exit” frameworks exist and/or are being used by international  
52 humanitarian aid agencies?  
53  
54  
55  
56  
57  
58  
59  
60



We aim at mapping the existing evidence regarding “responsible exit” strategies and the knowledge gaps. We will identify and describe the core concepts, theories and existing frameworks related to “responsible exit” of humanitarian aid agencies.

**Table 1.** PCC framework – attributes and rationale

| <b>PCC framework</b> | <b>Attributes</b>                                                                                              | <b>Rationale</b>                                                                                                                  |
|----------------------|----------------------------------------------------------------------------------------------------------------|-----------------------------------------------------------------------------------------------------------------------------------|
| <b>Participant</b>   | International non-governmental organizations                                                                   | Highly debated notions of “sustainability”, “relief-development nexus” and the “do no harm” principles in humanitarian operations |
| <b>Concept</b>       | Exit strategy                                                                                                  | Complex phenomenon and challenging process for humanitarian aid agencies                                                          |
| <b>Context</b>       | Humanitarian settings (natural & man-made disasters, conflicts, post-conflict, epidemics, forced displacement) | Natural scene of humanitarian aid agencies                                                                                        |

## METHODS AND ANALYSIS

The proposed project will be conducted in accordance with the Joanna Briggs Institute (JBI) methodology for scoping reviews. (18) More specifically, this section firstly details the processes of identifying and selecting relevant studies and reports. It then looks at the data extraction methodology and finally it presents how the findings will be analysed and presented.

### Identifying relevant studies and reports

#### Types of sources

This scoping review will consider both bibliographic databases and grey literature databases with no limitations to study designs. Literature reviews meeting the inclusion criteria will be considered.

## Search strategy

Using the above PCC frameworks, an initial limited keywords search of CAB Direct (including global health) and PubMed was undertaken to identify articles on the topic. The text words contained in the titles and abstracts of relevant articles, keywords and the subject headings used to describe the articles were used to develop a full search strategy. The last was reviewed by a librarian. The search strategy, including all identified keywords and index terms, was adapted for each selected database.

Following discussions with the librarian and using the above keywords and subject headings, we searched the following bibliographic databases: CAB Direct (including Global Health), Web of Science, PubMed, and Google Scholar. Moreover, we have carried out manual searches of specific journals, such as the Journal of Humanitarian Affairs, the Journal of Humanitarian Aid, and the Journal of Humanitarian Assistance. To identify grey literature, we first searched humanitarian organizational websites through google, using multiple phrases keywords + "site:.org ". Only the first ten pages, filtered by relevance were screened for relevant documents, uploaded on rayyan.ai. In a second stage, we directly contact major organizations and expert authors in humanitarian sector for relevant grey literature. Furthermore, the reference list of relevant studies and report will be searched for additional sources. Finally, backward, and forward reference tracking will be used to search for additional sources. The database searches were conducted between 5th December 2022 and 5th January 2023. The full search strategy in key databases is available as Supplementary Material.

Owing to resource limitations, only studies published in English, French and publicly available or accessible to authors through the Institute of Tropical Medicine of Antwerp's library databases will be included. No time limit (i.e., year of publication) was applied to the literature searches.

## Selecting relevant papers

### Selection process

Firstly, all identified citations will be collated and uploaded onto Rayyan.ai (19) and deduplicated. Secondly, titles and abstracts will be independently screened by DB, HS, and AK for assessment against the eligibility criteria (Table 2). Finally, against the same criteria, the full text of selected citations will be assessed in depth. All reasons for exclusion of sources of evidence will be recorded and displayed in the final report. Any disagreements that arise between the reviewers at any stage of the selection process will be resolved through discussion and if no agreement can be reached, BM will step in.

## Eligibility criteria

To be included in this review, the paper must explicitly discuss the exit of international non-governmental humanitarian aid agencies and be available in full text online, in Library or through direct contacts. Since we aim in focusing on international non-governmental humanitarian organizations, we will exclude all papers focused on military-humanitarian aid, governmental humanitarian aid, local humanitarian aid agencies, development aid, and papers that discuss studies from business, employment, and education sectors, as well as papers presenting exit strategies related to COVID-19 measures.

For this review, first, the “exit strategy” is understood as the organizational management practice of how an agency leaves a community after implementing a program. (17) Second, “responsible exit”, the concept of concern, is understood as “ensuring that the process of leaving aid recipients, communities, staff, and other stakeholders is conducted in transparent, respectful, and accountable manner” with the overall objective of “ensuring continuity of access to quality services.” Moreover, literature on related concepts such as “ethical”, “successful”, “good”, “accountable”, “viable” exit or “closing well” will be included. However, although the term “exit” is widely used in the literature, it is believed to be misleading since it emphasizes one point in time, while “exiting well” is described as a mindset and a process. (11)

We will include situations where a project was closed completely or handed over to another organization or entity, phased down or transitioned to recovery or development agencies.

The context is humanitarian aid settings, defined by natural and man-made disasters, armed conflicts, post-conflict settings, epidemics, situations of forced migration and fragile settings.

Further details of eligibility criteria are presented in Table 2.

**Table 2.** Eligibility criteria

| Criteria     |                                                      |  |                                                                                                        |
|--------------|------------------------------------------------------|--|--------------------------------------------------------------------------------------------------------|
| Domains      | Inclusion criteria                                   |  | Exclusion criteria                                                                                     |
| Participants | International non-governmental humanitarian agencies |  | Military-humanitarian aid, governmental humanitarian aid, local humanitarian agencies development aid, |

|                         |                                                                                                                                                                             |                                                                        |
|-------------------------|-----------------------------------------------------------------------------------------------------------------------------------------------------------------------------|------------------------------------------------------------------------|
|                         |                                                                                                                                                                             | business, employment, and education sectors, COVID-19 control measures |
| <b>Concept</b>          | Exit strategy (phase out, phase-down, phase-over, camp closure, transition from relief to rehabilitation)                                                                   | None                                                                   |
| <b>Context</b>          | Humanitarian settings (natural and man-made disasters, armed conflicts, post-conflict settings, epidemics, forced migration and fragile settings)                           | Others                                                                 |
| <b>Language</b>         | English and French                                                                                                                                                          | Others                                                                 |
| <b>Time restriction</b> | None                                                                                                                                                                        | None                                                                   |
| <b>Type of source</b>   | Published and unpublished papers without methodological limitations (journal papers, reports, guidelines, conference proceedings, magazines, newspaper, strategy papers...) | None                                                                   |

The results of the search and selection process will be fully reported in the final scoping review and presented in a Preferred Reporting Items for Systematic Reviews extension for scoping review (PRISMA-ScR) flow diagram. (20)

### Data extraction

Building on research questions and the pre-reading of 5 papers discussing extensively the notion of “responsible exit”, a draft extraction form is provided in Table 3. It includes bibliometric parameters (Authors, types of paper, year of publication or production, country of focus, context, organization) and thematic items regarding “exit” and “responsible exit” of humanitarian aid agencies. The initial data extraction form will be subject to modifications, in an iterative fashion, during the data extraction process. Any modification will be reported in the scoping review report.

**Table 3.** Data extraction form

| Domains              | Sub-domains   | Description                                                                               |
|----------------------|---------------|-------------------------------------------------------------------------------------------|
| <b>Bibliometrics</b> | Author (s)    | Last name, First name or name of the organization                                         |
|                      | Year          | Year of publication or production (grey literature)                                       |
|                      | Type of paper | Journal, Book, Book section, reports, guideline, conference proceedings, opinion paper... |

|                       |                       |                                                                                                 |
|-----------------------|-----------------------|-------------------------------------------------------------------------------------------------|
|                       | Country               | Country of focus if any                                                                         |
|                       | Context               | Protracted crisis, natural disaster, displacement, pandemic...                                  |
|                       | Organization          | Organization of Focus                                                                           |
| <b>Thematic items</b> | Definitions           | Related to exit                                                                                 |
|                       | Exit categories       | Types of exit strategies                                                                        |
|                       | Decision-making       | Concepts and theories in exit decision-making                                                   |
|                       | Challenges & outcomes | Challenges to successfully strategize & impacts of unsuccessful exits                           |
|                       | Responsible exit      | Key characteristics of responsible exits (definition, goal, attributes, and guiding principles) |
|                       | Frameworks            | Existing or used "responsible exit" frameworks                                                  |
|                       | Knowledge gaps        |                                                                                                 |

After piloting the above form on five randomly selected relevant papers, DB and NS will extract data from selected papers. Extracted data will be extensively and iteratively discussed with all authors and any unclear findings will be subject to further analysis and discussion.

### Data analysis and presentation

Extracted data will be collated, analyzed, and summarized in an iterative manner. First, we aim organizing the analysis of the findings by identifying key attributes and guiding principles throughout the project cycle, namely assessment and project design, project implementation and monitoring, exit decision-making, exit implementation and post-exit evaluation. Second, "responsible exit" frameworks (if any) will be analyzed for strength and weakness against the background of identified characteristics of "responsible exit." Third, the identification and selection processes will be summarized in a PRISMA-ScR frame, along with a tabulated and/or graphic summaries of the included references. Subsequently, in a narrative format, we will summarize the extracted data and report on them according to the review objectives. We anticipate a nine-month timeline, starting from December 2022, to finalize the present project.

### Patient and public involvement

None.

## ETHICS AND DISSEMINATION

Being a review, conducted on publicly available information, no ethical approval is required. The findings of the review will be submitted for publication in an open access scientific journal. The outcomes of this scoping review will be disseminated through conferences, workshops, and via humanitarian aid agencies to facilitate further research and possible practical translations of generated knowledge.

## Contributors

Djoki Bahati and Bruno Marchal: conceptualization. Djoki Bahati, Houssynatou Sy, Aram Kalhor: search and Selection of relevant papers. Djoki Bahati, Houssynatou Sy: data extraction, analysis, and elaboration of the first draft report. Djoki Bahati, Houssynatou Sy, Aram Kalhor and Bruno Marchal: review and finalization of the report.

## Acknowledgements

We acknowledge Dirk Schoonbaert (librarian from Institute of Tropical Medicine, Antwerp, Belgium) for input on database selection and review of the search strategy.

## Funding

This research received no specific grant from any funding agency in the public, commercial or not-for-profit sectors.

## Competing interest

None to declare.

## REFERENCES

1. United Nations Office for the Coordination of Humanitarian Affairs. Global humanitarian overview 2022 [Internet]. New York: United Nations; 2021. [cited 2022 Apr 23]. 304 p. Available from: <https://gho.unocha.org/>

- 1  
2  
3 2. Pal NE, Eckenwiler L, Hyppolite SR, et al. Ethical considerations for closing humanitarian projects:  
4 a scoping review. *J Int Humanit Action*. 2019 Nov 4;4(1):1–9. DOI: 10.1186/s41018-019-0064-9  
5  
6
- 7 3. Obrecht A, Swithern S, Doherty J. *The state of the humanitarian system 2022*. 5th ed. London:  
8 ALNAP; 2022. 358 p.  
9
- 10 4. Hill PS, Pavignani E, Michael M, et al. The “empty void” is a crowded space: health service  
11 provision at the margins of fragile and conflict affected states. *Confl Health*. 2014 Oct 22;8(1):10.  
12  
13
- 14 5. Brinkerhoff DW. *From humanitarian and post-conflict assistance to health system strengthening  
15 in fragile states: clarifying the transition and the role of NGOs*. Bethesda. 2008. 8 p.  
16  
17
- 18 6. Sung YL, Alpaslan Ö. Exit strategies. In: Ginty R Mac, Peterson JH, editors. *The routledge  
19 companion to humanitarian action*. 1st Ed. London: Routledge; 2015. p. 372-84.  
20  
21
- 22 7. Hunt M, Eckenwiler L, Hyppolite SR, et al. *Closing well: national and international humanitarian  
23 workers’ perspectives on the ethics of closing humanitarian health*  
24  
25
- 26 8. Bolt K, Westra M. *The current organizational approach to exit strategies in humanitarian relief  
27 projects: a study on decision-making processes in large humanitarian organizations*. [Thesis].  
28 Groningen: University of Groningen; 2014. 87 p.  
29  
30
- 31 9. Tull K. *Responsible exit from humanitarian interventions* [Internet]. Leeds: K4D helpdesk; 2020  
32 Apr 20 [cited 2022 Apr 14]. 21 p.  
33  
34 Available from: <https://opendocs.ids.ac.uk/opendocs/handle/20.500.12413/15307>  
35  
36
- 37 10. Heyse L. *Choosing the lesser evil - understanding decision making in humanitarian aid NGOs*.  
38 Burlington: Ashgate Publishing Limited; 2006. 252 p.  
39  
40
- 41 11. Ahmed F, Halley D, Robinson J. *Planning for success from start to exit: a review of literature,  
42 policy and practice* [Internet]. 2018. [cited 2021 Nov 11]. p. 36. Available from:  
43 <http://www.stoppingassuccess.org/publications/>  
44  
45
- 46 12. Sphere Association. *The sphere handbook: humanitarian charter and minimum standards in  
47 humanitarian response*. 4th Ed. Geneva: Sphere Association; 2018. 402p.  
48  
49
- 50 13. United Nations. *Agenda for humanity* [Internet]. New York: United Nations; 2016 [cited 2022  
51 May 30]. Available from:  
52 <http://agendaforhumanity.org/sites/default/files/AgendaforHumanity.pdf>  
53  
54
- 55 14. Hunt M, Miao J. *Moral entanglement and the ethics of closing humanitarian medical aid projects*.  
56 In: Ayesha A, Smith J, editors. *Humanitarian action and ethics*. London: Zed Books Ltd; 2017. p.  
57  
58  
59  
60

- 1  
2  
3 22-39.  
4  
5  
6 15. Lee H. Exit strategy for aid programs: planning exit before entering. *Int J Soc Sci Stud*.  
7 2017;5(7):22.  
8  
9  
10 16. Hayman R, James R. Exit strategies and sustainability: lessons for practitioners. Oxford: INTRAC;  
11 2016. 26 p.  
12  
13 17. Boardman M. Exit strategies: approaches and challenges in development. In: Thornton A,  
14 McGregor A, editors. *Southern perspectives on development: dialogue or division?* Dunedin:  
15 University of Otago; 2006. p. 477-86  
16  
17  
18  
19 18. Peters MDJ, Marnie C, Tricco AC, et al. Updated methodological guidance for the conduct of  
20 scoping reviews. *JBIM Evid Synth*. 2020 Oct 1;18(10):2119–26.  
21  
22  
23 19. Ouzzani M, Hammady H, Fedorowicz Z, et al. Rayyan-a web and mobile app for systematic  
24 reviews. *Syst Rev* [Internet]. 2016 Dec 5 [cited 2022 Dec 21];5(1). Available from:  
25 <https://pubmed.ncbi.nlm.nih.gov/27919275/>  
26  
27  
28  
29 20. Tricco AC, Lillie E, Zarin W, et al. PRISMA extension for scoping reviews (PRISMA-ScR): Checklist  
30 and explanation. *Ann Intern Med*. 2018;169(7):467–73.  
31  
32  
33  
34  
35  
36  
37  
38  
39  
40  
41  
42  
43  
44  
45  
46  
47  
48  
49  
50  
51  
52  
53  
54  
55  
56  
57  
58  
59  
60





|                                                                     |    |                                                                                                                                                                                                                                                                                                                    |                           |                                            |
|---------------------------------------------------------------------|----|--------------------------------------------------------------------------------------------------------------------------------------------------------------------------------------------------------------------------------------------------------------------------------------------------------------------|---------------------------|--------------------------------------------|
|                                                                     |    | OR AB=("handover policy")) OR AB=("handover guideline")) OR AB=("transition strategy")) OR AB=("transition policy")) OR AB=("transition guideline"))                                                                                                                                                               |                           |                                            |
| <b>Humanitarian organizations' websites</b>                         | 1  | "Emergency relief" OR "disasters" OR "relief work" OR "humanitarian assistance" OR "Non-governmental organization" OR "Non-governmental agency" OR "emergency relief" OR "humanitarian aid" AND "exit " OR "closing" OR "withdrawal strategy" OR "withdrawal" OR "phasing" OR "handover" OR "transition" site:.org | 10 <sup>th</sup> Dec 2022 | 193 (first 10 pages filtered by relevance) |
| <b>Google scholar</b>                                               | 1  | "Exit strategy" OR "closing strategy" OR "closure strategy" OR "phasing strategy" OR "transition strategy" OR "withdrawal strategy" AND "humanitarian organization" OR "humanitarian assistance" OR "humanitarian aid" OR "relief aid" OR "disaster aid"                                                           | 5 <sup>th</sup> Jan 2023  | 177 (first 10 pages filtered by relevance) |
| <b>Direct contact with organizations (Médecins Sans Frontières)</b> | NA | NA                                                                                                                                                                                                                                                                                                                 | 11 <sup>th</sup> Dec 22   | 23                                         |

Total records = 4221

Records after deduplication = 4067
