# Supplementary material for: Responsible exit of humanitarian aid agencies at the end of programmes: a scoping review protocol
Source: PubMed Central journal article supplement — BMJ Open. 2023 Aug 23;13(8):e071544. doi: 10.1136/bmjopen-2022-071544 (PMC10450037; doi:10.1136/bmjopen-2022-071544), 2023-08-23
Supplement: bmjopen-2022-071544supp001.pdf [file bmjopen-2022-071544supp001.pdf]

## Supplementary material- Full search strategy

|                                             | Search # | Query                                                                                                                                                                                                                                                                                                                                                                                                                                                                                                                                                                                                                                                                                                                                                                                                                                                                                                                                                                                                                                                                                                                                                                                                                                                                                                                                            | Date of search           | # of results |
|---------------------------------------------|----------|--------------------------------------------------------------------------------------------------------------------------------------------------------------------------------------------------------------------------------------------------------------------------------------------------------------------------------------------------------------------------------------------------------------------------------------------------------------------------------------------------------------------------------------------------------------------------------------------------------------------------------------------------------------------------------------------------------------------------------------------------------------------------------------------------------------------------------------------------------------------------------------------------------------------------------------------------------------------------------------------------------------------------------------------------------------------------------------------------------------------------------------------------------------------------------------------------------------------------------------------------------------------------------------------------------------------------------------------------|--------------------------|--------------|
| <b>CAB Direct (including global health)</b> | 1        | ((title:(("emergency relief" OR "Oxford Committee for Famine Relief" OR "relief" OR "disasters" OR "natural disasters" OR "non-governmental organization" OR "non-governmental agency" OR "humanitarian aid")) OR ab:(("emergency relief" OR "Oxford Committee for Famine Relief" OR "relief" OR "disasters" OR "natural disasters" OR "non-governmental organization" OR "non-governmental agency" OR "humanitarian aid"))) AND (title:(("exit " OR "closing" OR "withdrawal strategy" OR "withdrawal" OR "phasing" OR "handover" OR "transition") OR ab:(("exit" OR "closing" OR "withdrawal" OR "phasing" OR "handover" OR "transition"))                                                                                                                                                                                                                                                                                                                                                                                                                                                                                                                                                                                                                                                                                                     | 5 <sup>th</sup> Dec 2022 | 1852         |
| <b>PubMed</b>                               | 3        | (#1) AND (#2)                                                                                                                                                                                                                                                                                                                                                                                                                                                                                                                                                                                                                                                                                                                                                                                                                                                                                                                                                                                                                                                                                                                                                                                                                                                                                                                                    | 5 <sup>th</sup> Dec 2022 | 869          |
|                                             | 2        | (((((exit [Title/Abstract]) OR (closing [Title/Abstract])) OR (withdrawal [Title/Abstract])) OR (phasing [Title/Abstract])) OR (handover [Title/Abstract])) OR (transition [Title/Abstract]))                                                                                                                                                                                                                                                                                                                                                                                                                                                                                                                                                                                                                                                                                                                                                                                                                                                                                                                                                                                                                                                                                                                                                    | 5 <sup>th</sup> Dec 2022 | 577,660      |
|                                             | 1        | ((("Disasters"[Mesh]) OR "Natural Disasters"[Mesh]) OR "Relief Work"[Mesh] OR "Non-governmental organization" OR "non-governmental agency" OR "humanitarian aid"                                                                                                                                                                                                                                                                                                                                                                                                                                                                                                                                                                                                                                                                                                                                                                                                                                                                                                                                                                                                                                                                                                                                                                                 | 5 <sup>th</sup> Dec 2022 | 102,718      |
| <b>Web of Science</b>                       |          | ((((((((TI=("emergency relief")) OR TI=(disasters)) OR TI=("relief work")) OR TI=("humanitarian assistance")) OR TI=("Non-governmental organization")) OR TI=("Non-governmental agency")) OR AB=("emergency relief")) OR AB=("disasters")) OR AB=("relief work")) OR AB=("humanitarian assistance")) OR TI=("humanitarian aid")) OR AB=("humanitarian aid")) OR AB=("Non-governmental organization")) OR AB=("Non-governmental agency")) AND TI=("exit strategy")) OR TI=("exit guideline")) OR TI=("exit policy")) OR TI=("closing strategy")) OR TI=("closing policy")) OR TI=("closing guideline")) OR TI=("withdrawal strategy")) OR TI=("withdrawal policy")) OR TI=("withdrawal guideline")) OR TI=("phasing strategy")) OR TI=("phasing policy")) OR TI=("phasing guideline")) OR TI=("handover strategy")) OR TI=("handover guideline")) OR TI=("handover policy")) OR TI=("transition strategy")) OR TI=("transition policy")) OR TI=("transition guideline")) OR AB=("exit strategy")) OR AB=("exit guideline")) OR AB=("exit policy")) OR AB=("closing strategy")) OR AB=("closing policy")) OR AB=("closing guideline")) OR AB=("withdrawal strategy")) OR AB=("withdrawal policy")) OR AB=("withdrawal guideline")) OR AB=("phasing strategy")) OR AB=("phasing policy")) OR AB=("phasing guideline")) OR AB=("handover strategy")) | 7 <sup>th</sup> Dec 2022 | 1107         |

|                                                                     |    |                                                                                                                                                                                                                                                                                                                    |                           |                                            |
|---------------------------------------------------------------------|----|--------------------------------------------------------------------------------------------------------------------------------------------------------------------------------------------------------------------------------------------------------------------------------------------------------------------|---------------------------|--------------------------------------------|
|                                                                     |    | OR AB=("handover policy")) OR AB=("handover guideline")) OR AB=("transition strategy")) OR AB=("transition policy")) OR AB=("transition guideline"))                                                                                                                                                               |                           |                                            |
| <b>Humanitarian organizations' websites</b>                         | 1  | "Emergency relief" OR "disasters" OR "relief work" OR "humanitarian assistance" OR "Non-governmental organization" OR "Non-governmental agency" OR "emergency relief" OR "humanitarian aid" AND "exit " OR "closing" OR "withdrawal strategy" OR "withdrawal" OR "phasing" OR "handover" OR "transition" site:.org | 10 <sup>th</sup> Dec 2022 | 193 (first 10 pages filtered by relevance) |
| <b>Google scholar</b>                                               | 1  | "Exit strategy" OR "closing strategy" OR "closure strategy" OR "phasing strategy" OR "transition strategy" OR "withdrawal strategy" AND "humanitarian organization" OR "humanitarian assistance" OR "humanitarian aid" OR "relief aid" OR "disaster aid"                                                           | 5 <sup>th</sup> Jan 2023  | 177 (first 10 pages filtered by relevance) |
| <b>Direct contact with organizations (Médecins Sans Frontières)</b> | NA | NA                                                                                                                                                                                                                                                                                                                 | 11 <sup>th</sup> Dec 22   | 23                                         |

Total records = 4221

Records after deduplication = 4067
